# Supplementary material for: A novel smart polymer responsive to CO2
Source: Royal Society of Chemistry journal article supplement (doi:10.1039/c1cc12388b), 2011-01-01
Supplement: c1cc12388b.pdf [file c1cc12388b.pdf]

## Electronic Supplementary Information (ESI)

# A novel smart polymer responsive to CO<sub>2</sub>

Zanru Guo,<sup>a,b</sup> Yujun Feng,\*<sup>a</sup> Yu Wang,<sup>a</sup> Jiyu Wang,<sup>a,b</sup> Yufeng Wu,<sup>a,b</sup> and Yongmin Zhang<sup>a,b</sup>

<sup>a</sup> Chengdu Institute of Organic Chemistry, Chinese Academy of Sciences, Chengdu 610041, China. E-mail: yjfeng@cioc.ac.cn

<sup>b</sup> Graduate School of Chinese Academy of Sciences, Beijing 100039, China.

## Detailed Synthesis and Characterizations

### Materials

P-chloromethylstyrene (CMS) (Aldrich, 90%) was purified by vacuum distillation from CaH<sub>2</sub>, and 2,2-azoisobutyronitrile (AIBN) (Aldrich, 98%) was recrystallized from diethylether prior to use. The chain transfer agent (CTA), S-1-dodecyl-S'-( $\alpha,\alpha'$ -dimethyl - $\alpha''$ -aceticacid)trithiocarbonate, was synthesized following a previously reported procedure.<sup>1</sup> Tetrahydrofuran (THF) (Guangdong Guanghua Chemical Co. Ltd, 99.8%) was dried and distilled over benzophenone-Na. N,N-dimethylacetamide dimethyl acetal (Aldrich, 90.0%), N,N,N',N'',N'''-pentamethyldiethylenetriamine (PMDTA) (Aldrich, 99.0%) and propargyl amine (Shanghai Rainbow Chemical Co., Ltd., 99.3%) were used as received. All other reagents were purchased from Shanghai Chemical Reagent Co., Ltd., and used as received unless otherwise specified.

### Characterizations

<sup>1</sup>H NMR spectra were recorded at 25 °C on a Bruker AV300 NMR spectrometer at 300 MHz. Chemical shifts ( $\delta$ ) are reported in parts per million (ppm) with reference to the residual protons of the deuterated solvents.

Infrared spectra were registered on a Nicolet MX-1E FTIR (USA) spectrophotometer in the scanning range of 4000–400 cm<sup>-1</sup> using KBr pellet method or paraffin liquid cell.

Relative molecular weight and molecular weight distribution were determined by one of the following two gel permeation chromatography (GPC) systems depending on the solubility of the polymers. The first one is equipped with a waters model 1515 pump, a model 2410 refractive index detector, and an OH-pak KB-803 column operated at an oven temperature of 25 °C. THF was used as the mobile phase at a flow rate of 0.8 ml·min<sup>-1</sup>, and the column was calibrated using poly(ethylene oxide) (PEO) as standard in this case. The other is PL GPC50 with a refractive index detector, and the columns (7.5 × 300 mm PLgel Mixed-C) were eluted by DMF and calibrated with poly(methylmethacrylate) (PMMA) standard. Analysis was performed at 40 °C with flow rate of 1.0 ml·min<sup>-1</sup>.

Conductivity of the wet DMF solution of amidine-based polymer was measured with a DDS-11A conductometer (Chengdu Fangzhou Instrument) at 25 °C, and average values were calculated from three runs of a certain measurement.

The X-ray photoelectron spectroscopy (XPS) experiments were performed on a Kratos XSAM800 XPS system (Kratos Ltd.). The measurement parameters are: photon energy (Al K $\alpha$ ) = 1486.6 eV, P = 12 KW × 1 mA.

### Preparation of N'-Propargyl-N,N-dimethylacetamidines (PDAA)

To a CH<sub>3</sub>CN (8.0 ml) solution of N,N-dimethylacetamide dimethyl acetal (2.00 g, 15.00 mmol) was added propargylamine (0.82 g, 15.00 mmol) via a syringe. The reaction mixture was stirred

## Electronic Supplementary Information (ESI)

under N<sub>2</sub> at 65 °C for 1.5 h. After removal of the solvent, the crude product was purified by basic Al<sub>2</sub>O<sub>3</sub> chromatography using CH<sub>2</sub>Cl<sub>2</sub>/CH<sub>3</sub>OH (10:1) as eluent to give the final compound as a yellow liquid (1.32 g, 10 mmol, 71.0%). As PDAA can react with CO<sub>2</sub> in the air, it is necessary to keep it under argon or N<sub>2</sub>. <sup>1</sup>H NMR (CDCl<sub>3</sub>): δ 2.21 (s, 3H), 2.28 (t, *J* = 2.4 Hz, 1H), 3.11 (s, 6H), 4.10 (d, *J* = 2.7 Hz, 2H). FI-IR: 2110.3 cm<sup>-1</sup> (C≡C), 1639.5 cm<sup>-1</sup> (C=N).

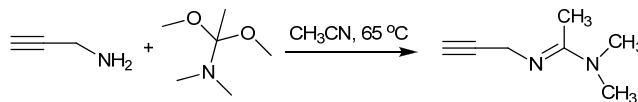

**Scheme S1.** Synthesis of N'-propargyl-N,N-dimethylacetamidines (PDAA).

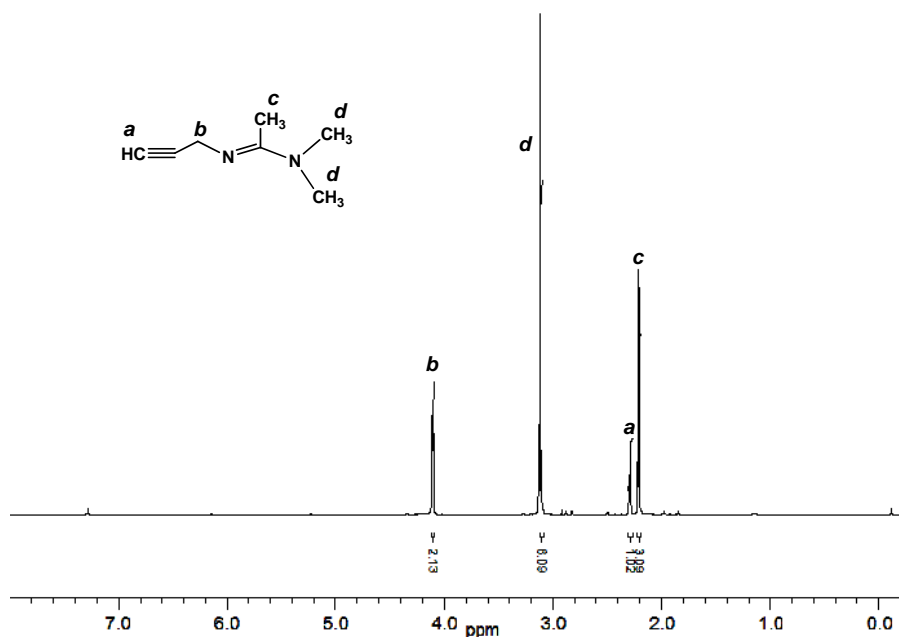

**Figure S1.** <sup>1</sup>H NMR spectrum of N'-propargyl-N,N-dimethylacetamidines in CDCl<sub>3</sub>.

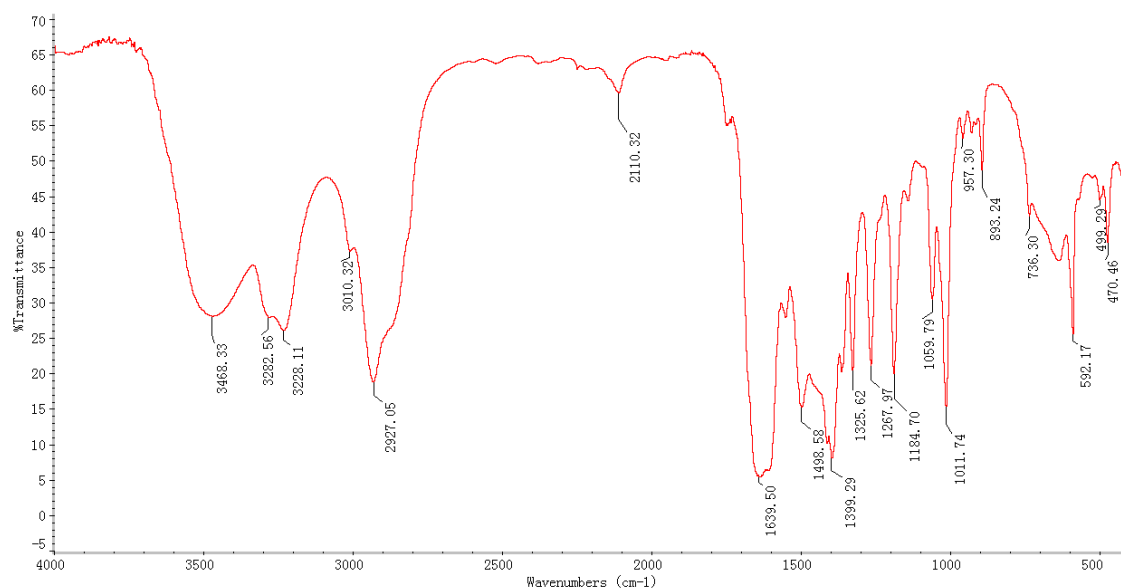

**Figure S2.** IR spectrum of N'-propargyl-N,N-dimethylacetamidines (paraffin liquid cell procedure).



## Electronic Supplementary Information (ESI)

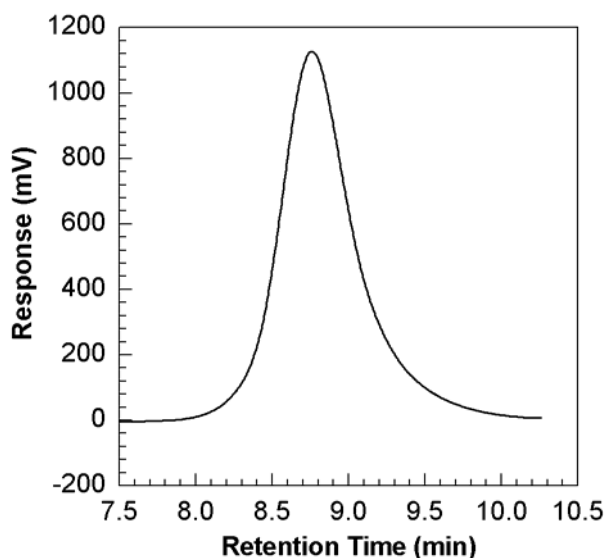

**Figure S4.** GPC chromatogram for PCMS.

### Preparation of Poly(p-azidomethylstyrene) (PAMS)

PCMS (2.00 g, 0.54 mmol) was dissolved in 30 ml dry DMF, and then  $\text{NaN}_3$  (3.86 g, 65.50 mmol) was added. The reaction mixture was stirred at room temperature for 2 days and then precipitated in excess of methanol. The obtained product was redissolved in dichloromethane and reprecipitated in methanol. The resultant solid was collected by filtration and dried overnight in a vacuum oven for 24 h to give PAMS. Yield: 1.8 g (90%). The chemical shifts of the benzylic protons were changed from 4.51 ppm in PCMS to 4.27 ppm in PAMS, indicating that all chloro groups have been converted into azido units. THF-GPC:  $M_n = 5240 \text{ g}\cdot\text{mol}^{-1}$ ,  $\text{PDI} = 1.47$ .  $^1\text{H}$  NMR ( $\text{CDCl}_3$ , 300 MHz),  $\delta$  7.01 and 6.51 (arom.  $\text{CH}$  of styrenic ring), 4.27 ( $\text{CH}_2\text{N}_3$ ), 1.72 and 1.45 ( $\text{CH}$  and  $\text{CH}_2$  of polymer chain). FI-IR:  $2094.3 \text{ cm}^{-1}$  ( $-\text{N}_3$ ).

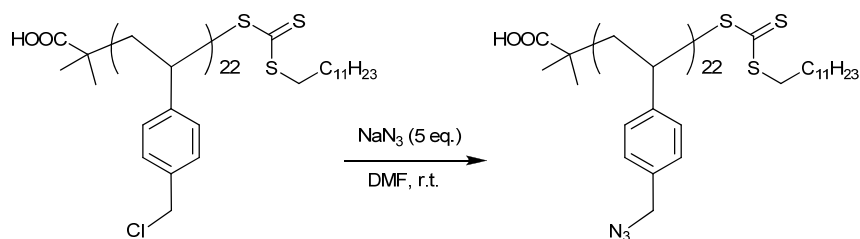

**Scheme S3.** Postmodification of PCMS into PAMS.

Electronic Supplementary Information (ESI)

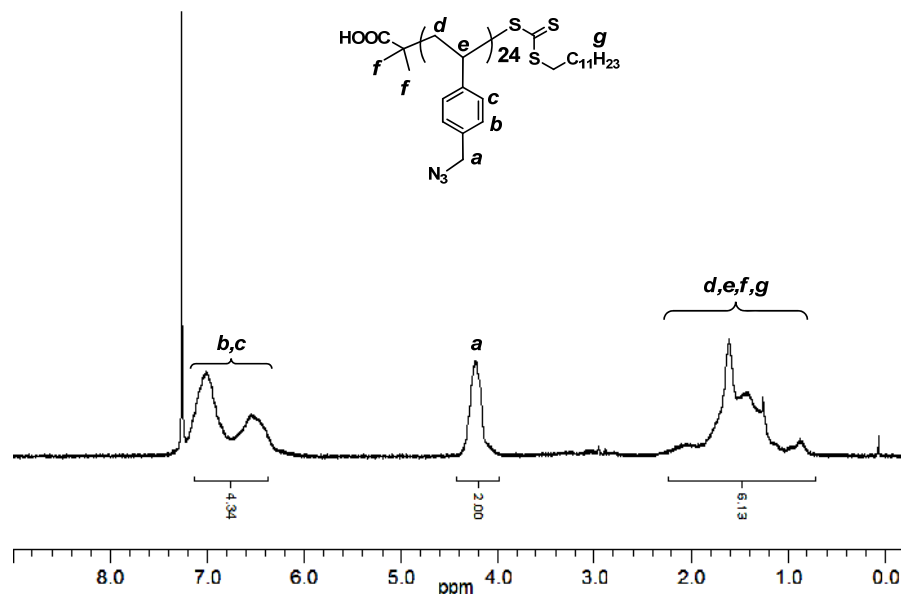

Figure S5. <sup>1</sup>H NMR spectrum of PAMS in CDCl<sub>3</sub>.

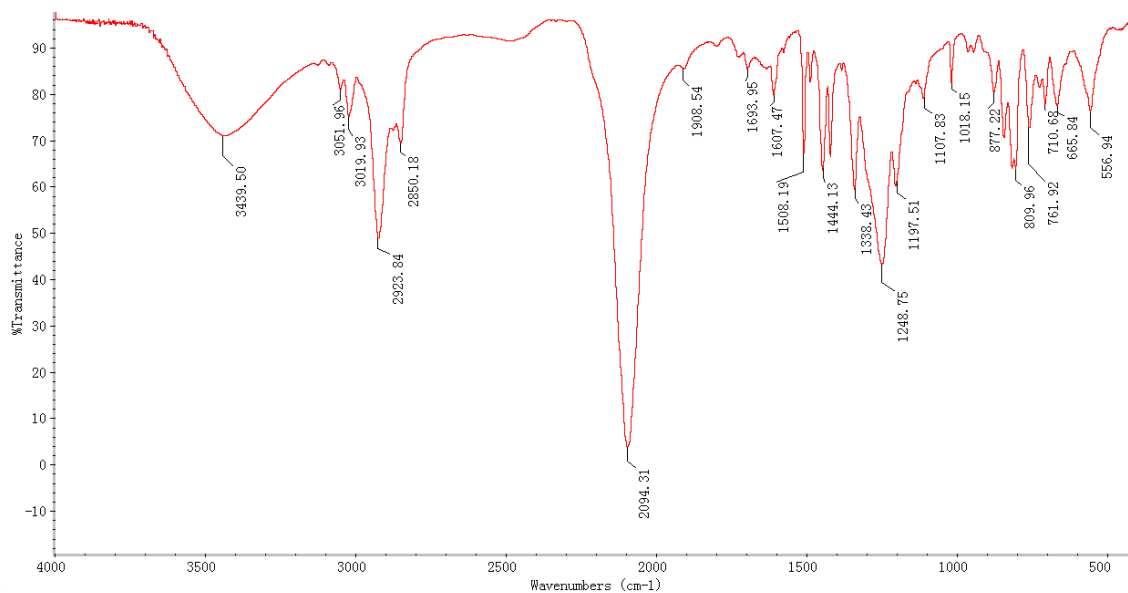

Figure S6. IR spectrum of PAMS (KBr pellet method).

## Electronic Supplementary Information (ESI)

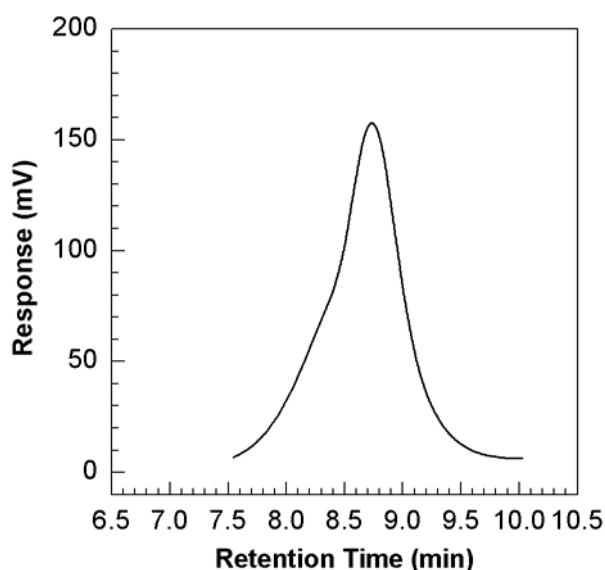

**Figure S7.** GPC chromatogram for PAMS.

### Preparation of amidine-based polymer by “click” reaction

To a solution of PAMS (1.00 g, 0.26 mmol) and PDAA (1.30 g, 10.50 mmol) in 20 ml DMF, the catalyst CuBr (1.22 g, 8.50 mmol) and PMDETA (1.47 g, 8.50 mmol) were added. The reaction vessel was sealed and the mixture was degassed by doing three freeze-pump-thaw cycles. The solution was stirred under argon at room temperature overnight. At the end of this period, the polymer solution was passed through a basic alumina column several times to remove copper salt. Finally, the polymer solution was precipitated into ether. After filtration, the polymer was dried in a vacuum oven. Yield: 1.2 g (70 %). The chemical shifts of the benzylic protons were changed from 4.27 ppm in PAMS to 5.37 ppm in the amidine-based polymer, indicating that the click reaction between PDAA and PAMS was accomplished. DMF-GPC:  $M_n = 10759 \text{ g}\cdot\text{mol}^{-1}$ , PDI = 1.15. FI-IR:  $1645 \text{ cm}^{-1}$  (C=N).

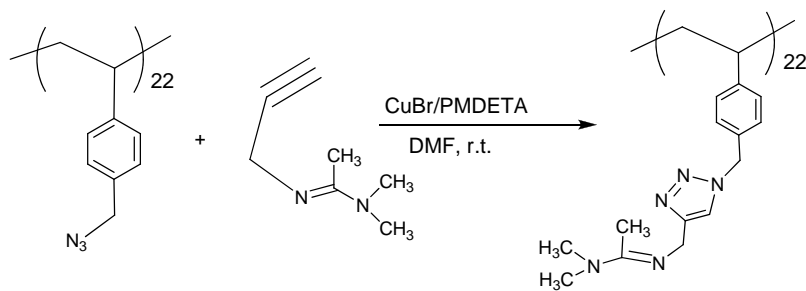

**Scheme S4.** Synthesis of amidine-based polymer by “clicking” PDAA onto PAMS.

Electronic Supplementary Information (ESI)

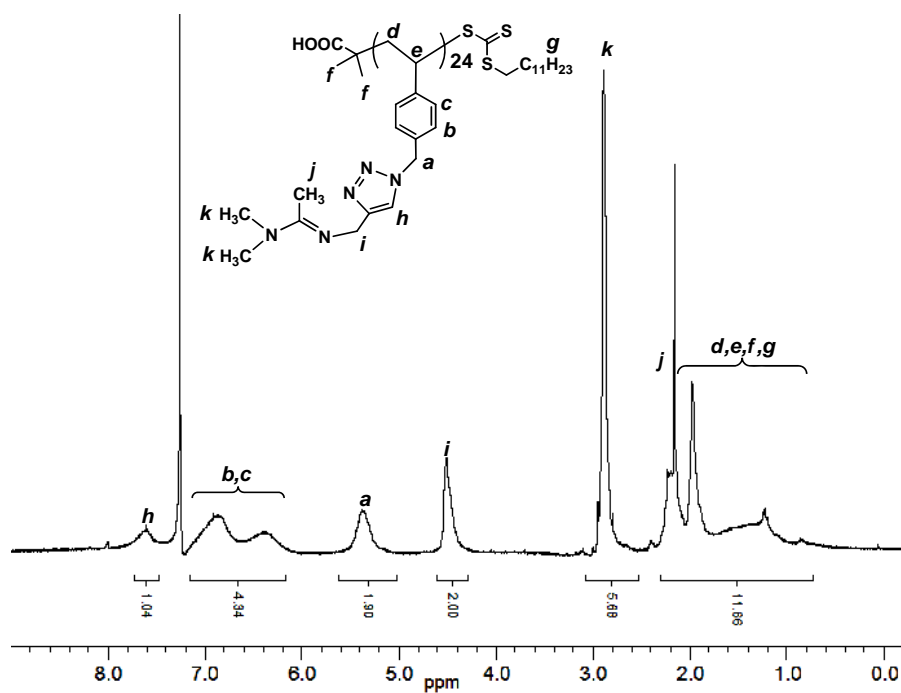

**Figure S8.** <sup>1</sup>H NMR (300 MHz) spectrum of the amidine-based polymer in CDCl<sub>3</sub>.

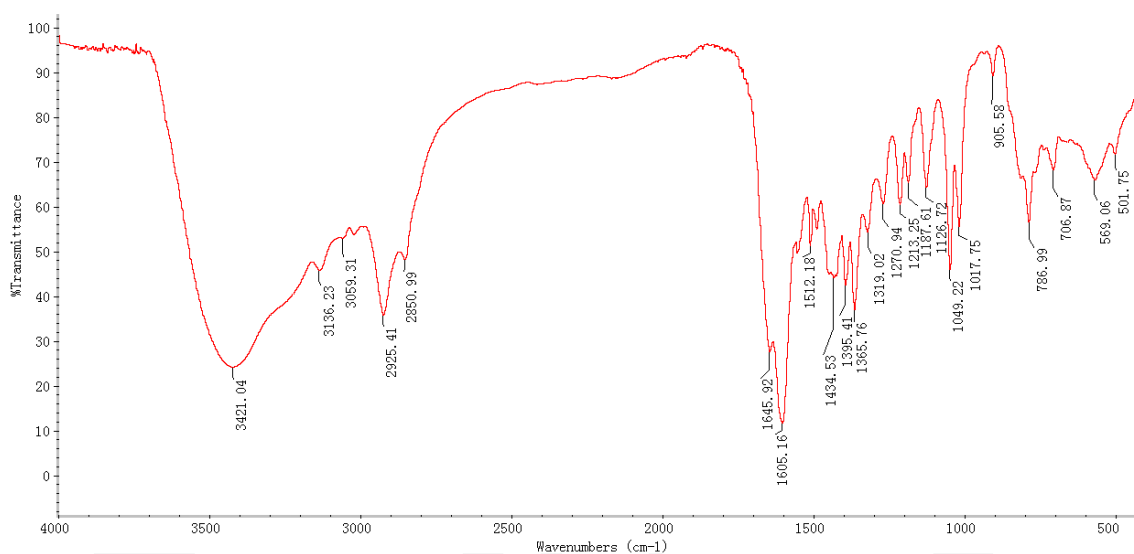

**Figure S9.** IR spectrum of the amidine-based polymer (KBr pellet method).

## Electronic Supplementary Information (ESI)

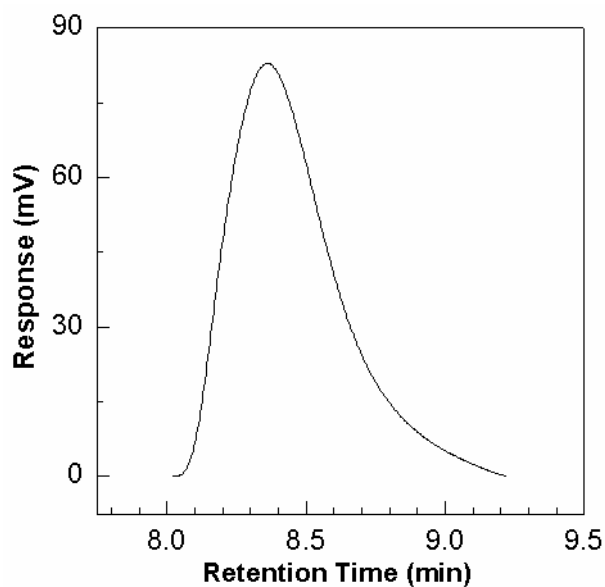

**Figure S10.** GPC chromatogram for the amidine-based polymer.

## XPS spectrum of the amidine-based polymer

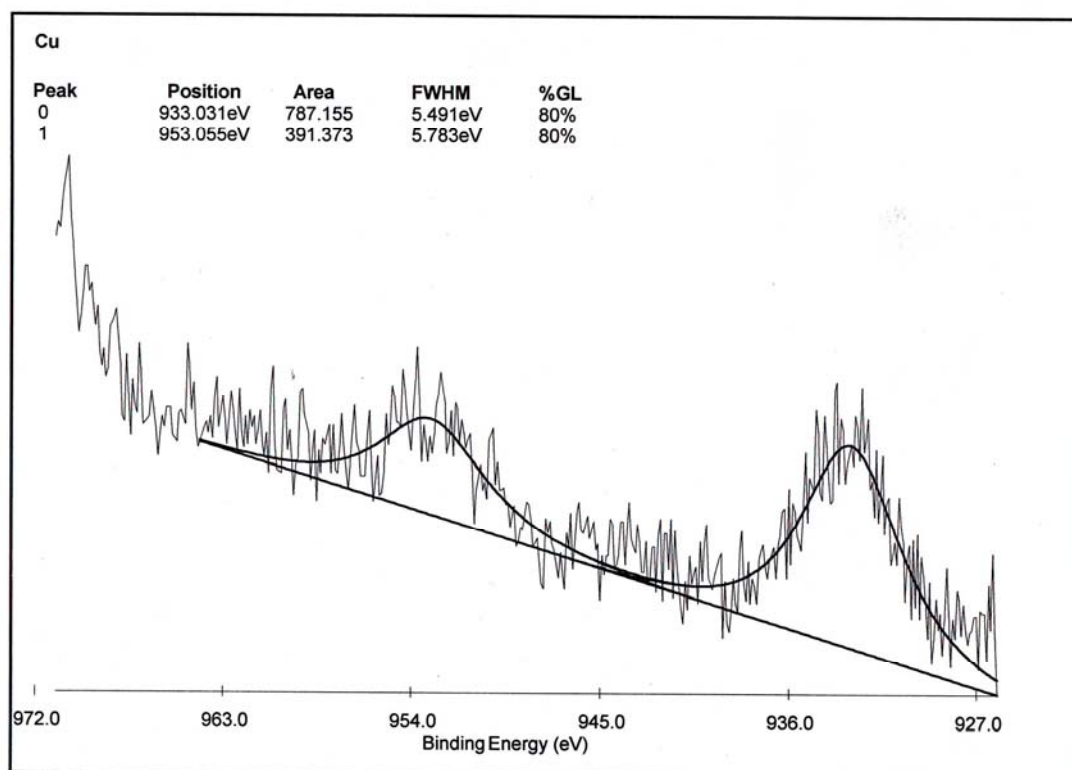

**Figure S11.** XPS spectrum of the amidine-based polymer. The binding energy ranges from 927 to 972 ev.

From the XPS spectrum of amidine-based polymer samples (Fig. S11), it can be seen that the binding energy of 933 and 953 are the peaks of Cu 2p<sub>3/2</sub> and Cu 2p<sub>1/2</sub> respectively, which indicates that amidine-based polymer trapped copper ions.



## Electronic Supplementary Information (ESI)

---

### Reference

1. J. T. Lai, D. Filla, R. Shea, *Macromolecules*, 2002, **35**, 6754.
